# Supplementary material for: Mechanisms and potential immune tradeoffs of accelerated coral growth induced by microfragmentation
Source: PeerJ. 2022 Mar 29;10:e13158. doi: 10.7717/peerj.13158 (PMC8973463; doi:10.7717/peerj.13158)
Supplement: Supplemental Information 11 [file peerj-10-13158-s011.xlsx]

## Sheet: Complete Table
Gene ID	baseMean	log2FoldChange	lfcSE	stat	pvalue	padj	Annotation	Domain	E value
Orbicella faveolata host - continuous: Weight Change
LOC110040650	8.86164	-0.55763	0.139153	-4.00731	6.14e-05	0.054165	Orbicella faveolata uncharacterized	EURL Protein	0.00621
LOC110041199	7.63427	-0.87762	0.227981	-3.84953	0.000118	0.062157	cannabinoid receptor 1-like		0
LOC110044021	8.32391	-0.75387	0.189241	-3.98363	6.79e-05	0.054165	solute carrier family 22 member 15-like		0
LOC110044214	7.77189	-0.50138	0.140721	-3.56294	0.000367	0.096302	Orbicella faveolata uncharacterized, transcript variant X1	Nucleopolyhedrovirus Capsid Protein P87	-0.0034
LOC110044329	21.8678	-0.52628	0.127864	-4.11595	3.86e-05	0.054165	GFP-like fluorescent chromoprotein cFP484		0
LOC110044882	4.63351	-0.84925	0.201731	-4.20981	2.56e-05	0.0455	centromere protein F-like		0
LOC110045686	19.3822	-0.47293	0.12201	-3.87613	0.000106	0.062157	nematocyst expressed protein 6-like		0
LOC110046585	8.45958	0.427055	0.118346	3.60853	0.000308	0.096302	Orbicella faveolata uncharacterized	No conserved domain found	0
LOC110047196	11.6072	0.46458	0.115755	4.01348	5.98e-05	0.054165	Orbicella faveolata uncharacterized	TRP Super Family	3.88e-21
LOC110047361	313.424	-0.34062	0.09067	-3.75669	0.000172	0.077673	carbonic anhydrase 2-like		0
LOC110047363	92.6646	-0.56432	0.094975	-5.94179	2.82e-09	2.81e-05	carbonic anhydrase 12-like		0
LOC110049800	9.75119	-0.62133	0.147856	-4.20227	2.64e-05	0.0455	flocculation protein FLO11-like		0
LOC110050428	10.4706	-0.91646	0.209591	-4.37259	1.23e-05	0.0455	Orbicella faveolata uncharacterized	No conserved domain found	0
LOC110051631	7.8494	0.468354	0.124997	3.74691	0.000179	0.077673	9-divinyl ether synthase-like		0
LOC110051973	22.3447	0.259083	0.072452	3.57593	0.000349	0.096302	ubiquitin-conjugating enzyme E2 G1-like		0
LOC110052295	6.24637	-0.8051	0.201495	-3.99563	6.45e-05	0.054165	metabotropic glutamate receptor 3-like		0
LOC110053783	4.95415	-0.91126	0.235712	-3.86598	0.000111	0.062157	Orbicella faveolata uncharacterized	No conserved domain found	0
LOC110053809	29.8957	-0.32522	0.081069	-4.01166	6.03e-05	0.054165	Orbicella faveolata uncharacterized	Deoxycytidylate Deaminase Domain	5.03e-37
LOC110053859	9.00224	-0.52576	0.136511	-3.85143	0.000117	0.062157	pectin acetylesterase 4-like		0
LOC110055661	13.9011	-0.54298	0.146058	-3.71754	0.000201	0.083443	sodium bicarbonate transporter-like protein 11		0
LOC110056220	5.73243	-0.65063	0.168577	-3.85955	0.000114	0.062157	Orbicella faveolata uncharacterized	Calcium-Activated Potassium Channel, Beta Subunit	-1.14e-08
LOC110058682	14.3825	-0.54639	0.148426	-3.68125	0.000232	0.088805	neuropeptide FF receptor 1-like		0
LOC110059792	6.72832	-0.88186	0.240132	-3.67241	0.00024	0.088805	NHL repeat-containing protein 2-like		0
LOC110060334	39.0417	0.232463	0.055422	4.19442	2.74e-05	0.0455	unconventional myosin-VI-like		0
LOC110060594	11.6574	-0.50641	0.140584	-3.60217	0.000316	0.096302	Orbicella faveolata uncharacterized	Death Domain	-1.42e-13
LOC110061378	5.8571	-0.98514	0.247873	-3.97438	7.06e-05	0.054165	protein glass-like		0
LOC110061392	216.299	0.373597	0.104661	3.56959	0.000358	0.096302	glutamic acid-rich protein-like		0
LOC110061602	6.52204	-0.74543	0.201042	-3.70783	0.000209	0.083443	integumentary mucin C.1-like		0
LOC110065018	20.4716	-0.43463	0.112261	-3.87164	0.000108	0.062157	acyl-CoA dehydrogenase family member 11-like		0
LOC110066684	6.49239	-0.51763	0.144105	-3.59201	0.000328	0.096302	Orbicella faveolata uncharacterized	Disintegrin super family	-0.000166
LOC110066721	6.16539	-0.61411	0.169401	-3.62522	0.000289	0.096302	alpha-1,3/1,6-mannosyltransferase ALG2-like		0
LOC110067328	9.6595	-0.55204	0.146235	-3.775	0.00016	0.076033	low-density lipoprotein receptor-related protein 2-like		0
LOC110068187	10.3686	-0.39224	0.109359	-3.5867	0.000335	0.096302	cathepsin L1-like		0
LOC110068353	7.58803	-0.78111	0.216808	-3.60279	0.000315	0.096302	Orbicella faveolata uncharacterized	No conserved domain found	0
LOC110068463	68.0599	0.265317	0.070134	3.783	0.000155	0.076033	muscleblind-like protein 3		0
LOC110068614	21.3549	-0.4436	0.123966	-3.57841	0.000346	0.096302	Orbicella faveolata uncharacterized	No conserved domain found	0
LOC110069044	15.1789	-0.80841	0.187549	-4.3104	1.63e-05	0.0455	receptor-type guanylate cyclase gcy-28-like		0
LOC110069628	6.80007	-0.63773	0.174449	-3.65565	0.000257	0.091424	band 7 protein AGAP004871-like		0
Orbicella faveolata host - binned: Weight Change
LOC110045434	12.7199	1.08893	0.255667	4.25918	2.05e-05	0.067155	Orbicella faveolata uncharacterized	No conserved domain found	0
LOC110046266	11.1074	1.53325	0.38398	3.99305	6.52e-05	0.081365	Orbicella faveolata uncharacterized	"lg_3" Immunoglobulin domain	-1e-16
LOC110047948	16.772	1.29809	0.329971	3.93396	8.36e-05	0.083384	Orbicella faveolata uncharacterized	No conserved domain found	2e-171
LOC110049097	15.8365	-1.05532	0.267696	-3.94222	8.07e-05	0.083384	protein Wnt-1-like		0
LOC110050428	10.4706	-2.47107	0.486466	-5.07965	3.78e-07	0.001887	Orbicella faveolata uncharacterized	No conserved domain found	0
LOC110051021	23.5957	0.954937	0.230257	4.14726	3.36e-05	0.067155	cytochrome b-245 light chain-like		0
LOC110051631	7.8494	1.34274	0.330372	4.06433	4.82e-05	0.080115	9-divinyl ether synthase-like		0
LOC110052394	46.6465	1.01381	0.241509	4.19784	2.69e-05	0.067155	Orbicella faveolata uncharacterized	Eukaryotic cytochrome b(561)	-1.8e-38
LOC110053809	29.8957	-0.97805	0.191972	-5.09477	3.49e-07	0.001887	Orbicella faveolata uncharacterized	Deoxycytidylate deaminase domain	-5.03e-37
LOC110068545	7.28268	1.92052	0.480051	4.00066	6.32e-05	0.081365	GA-binding protein alpha chain-like		0
Montastraea cavernosa host - continuous: Weight Change
Mcavernosa16889	27.3851	0.614392	0.141324	4.34741	1.38e-05	0.054338	Transmembrane protein 86A		0
Mcavernosa20434	9.36996	-1.21418	0.276239	-4.39541	1.11e-05	0.054338	Guanylate binding protein		0
Montastraea cavernosa host - binned: Initial Weight								Domain	E-Value
Mcavernosa00443	58.7772	1.87555	0.44015	4.26116	2.03e-05	0.026733	No matching genes	No conserved domain found	NA
Mcavernosa04889	21.9482	1.82678	0.353828	5.16289	2.43e-07	0.001526	Orbicella faveolata LWamide neuropeptides-like (LOC110063334), transcript variant X2, mRNA		0
Mcavernosa05313	4.97615	2.10934	0.551451	3.82507	0.000131	0.068741	No matching genes	No conserved domain found	NA
Mcavernosa10157	13.8427	1.77658	0.441203	4.02666	5.66e-05	0.037118	Spodoptera frugiperda trypsin beta-like (LOC118263550), mRNA		9e-06
Mcavernosa10167	50.4965	1.28516	0.337651	3.80619	0.000141	0.069567	Orbicella faveolata uncharacterized	Scavenger receptor Cys-rich	-2.6e-24
Mcavernosa10813	40.4804	0.594881	0.143657	4.14099	3.46e-05	0.030305	Orbicella faveolata polycystin-2-like (LOC110046666), mRNA		0
Mcavernosa11008	10.8655	1.59994	0.358887	4.45806	8.27e-06	0.016308	Orbicella faveolata transmembrane protease serine 9-like (LOC110053620), mRNA		0
Mcavernosa11572	12.7725	1.97415	0.474347	4.16183	3.16e-05	0.030305	Orbicella faveolata coadhesin-like (LOC110058073), mRNA		0
Mcavernosa11574	9.00524	1.68481	0.420994	4.00197	6.28e-05	0.037118	Orbicella faveolata coadhesin-like (LOC110058073), mRNA		0
Mcavernosa14126	11.552	-1.19475	0.318658	-3.74931	0.000177	0.077697	Orbicella faveolata WW domain-binding protein 11-like (LOC110065145), transcript variant X2, mRNA		1e-100
Mcavernosa19126	10.3757	1.28124	0.317589	4.03428	5.48e-05	0.037118	No matching genes	Dermatopontin	1.33e-49
Mcavernosa20351	6.68866	2.03945	0.498998	4.08709	4.37e-05	0.034452	Orbicella faveolata radial spoke head 1 homolog (LOC110046152), mRNA		0
Mcavernosa21961	13.4314	2.00313	0.501953	3.99067	6.59e-05	0.037118	Orbicella faveolata transmembrane protein 101-like (LOC110040405), mRNA		9e-167
Mcavernosa23355	7.09178	1.38719	0.332327	4.17417	2.99e-05	0.030305	Pocillopora damicornis membrane-bound O-acyltransferase domain-containing protein 2-like (LOC113672275), mRNA		1e-38
Mcavernosa24710	33.8834	0.836007	0.194734	4.29307	1.76e-05	0.026733	Orbicella faveolata guanine nucleotide-binding protein G(i) subunit alpha-like (LOC110066585), mRNA		0
Mcavernosa25670	5.42877	2.04065	0.420922	4.84804	1.25e-06	0.003278	No matching genes	WSC domain	-1.82e-06
Mcavernosa30869	21.6742	1.79777	0.354223	5.07524	3.87e-07	0.001526	Acropora tenuis AtTL-2 mRNA for N-acetyl-D-galactosamine binding lectin precursor, complete cds		0
Mcavernosa30913	60.102	0.569897	0.15038	3.7897	0.000151	0.069975	Pocillopora damicornis fructose-bisphosphate aldolase C-like (LOC113685665), mRNA		0
