# Supplementary material for: Mechanisms and potential immune tradeoffs of accelerated coral growth induced by microfragmentation
Source: PeerJ. 2022 Mar 29;10:e13158. doi: 10.7717/peerj.13158 (PMC8973463; doi:10.7717/peerj.13158)
Supplement: Supplemental Information 12 [file peerj-10-13158-s012.xlsx]

## Sheet: all_sig_GO_results
term	name	p.adj	delta.rank	category	comparison			Totals
GO:0006612;GO:0090150	establishment of protein localization to membrane	0.0468	468	BP	Mcav WT1 Binned			Mcav	WT1	binned	BP	1
GO:0005840;GO:0044391	ribosome	0.0494	351	CC	Mcav WT1 Binned			Mcav	WT1	binned	CC	2
GO:0044445	obsolete cytosolic part	0.0246	385	CC	Mcav WT1 Binned			Mcav	WT1	binned	MF	1
GO:0003735	structural constituent of ribosome	0.0198	417	MF	Mcav WT1 Binned			Mcav	Wtchange	binned	CC	1
GO:0044455	obsolete mitochondrial membrane part	0.0329	444	CC	Mcav WTchange Binned			Mcav	Wtchange	continuous	BP	12
GO:0006412;GO:0043043;GO:0006518;GO:0043604	peptide metabolic process	0.026	287	BP	Mcav Wtchange Continuous			Mcav	Wtchange	continuous	CC	12
GO:0006413	translational initiation	0.0141	547	BP	Mcav Wtchange Continuous			Mcav	Wtchange	continuous	MF	4
GO:0006414;GO:0006415;GO:0019080;GO:0019083	translational elongation	0.0141	583	BP	Mcav Wtchange Continuous			Ofav	WT1	continuous	MF	3
GO:0006613;GO:0006614;GO:0045047;GO:0072599;GO:0070972	protein localization to endoplasmic reticulum	0.026	529	BP	Mcav Wtchange Continuous			Ofav	Wtchange	continuous	CC	2
GO:0019058	viral life cycle	0.026	527	BP	Mcav Wtchange Continuous			Ofav	Wtchange	continuous	MF	1
GO:0034976	response to endoplasmic reticulum stress	0.0996	478	BP	Mcav Wtchange Continuous							39
GO:0042446;GO:0120178	hormone biosynthetic process	0.034	-1322	BP	Mcav Wtchange Continuous
GO:0042743	hydrogen peroxide metabolic process	0.0141	1247	BP	Mcav Wtchange Continuous
GO:0042744	hydrogen peroxide catabolic process	0.0141	1617	BP	Mcav Wtchange Continuous
GO:0043624;GO:0032984	protein-containing complex disassembly	0.026	506	BP	Mcav Wtchange Continuous
GO:0060444;GO:0060603;GO:0061180	mammary gland epithelium development	0.0996	-1001	BP	Mcav Wtchange Continuous
GO:0072593	reactive oxygen species metabolic process	0.0697	668	BP	Mcav Wtchange Continuous
GO:0005604;GO:0062023	collagen-containing extracellular matrix	0.0452	518	CC	Mcav Wtchange Continuous
GO:0005746;GO:0070469;GO:0098803	mitochondrial respirasome	0.0658	535	CC	Mcav Wtchange Continuous
GO:0005840;GO:0044391	ribosome	0.0209	345	CC	Mcav Wtchange Continuous
GO:0005938	cell cortex	0.0912	-250	CC	Mcav Wtchange Continuous
GO:0015934	large ribosomal subunit	0.022	453	CC	Mcav Wtchange Continuous
GO:0019866;GO:0005743	organelle inner membrane	0.0912	219	CC	Mcav Wtchange Continuous
GO:0022625	cytosolic large ribosomal subunit	0.00246	621	CC	Mcav Wtchange Continuous
GO:0022626	cytosolic ribosome	0.000525	548	CC	Mcav Wtchange Continuous
GO:0044445	obsolete cytosolic part	0.00246	417	CC	Mcav Wtchange Continuous
GO:0044455	obsolete mitochondrial membrane part	0.00246	481	CC	Mcav Wtchange Continuous
GO:0097060	synaptic membrane	0.0912	381	CC	Mcav Wtchange Continuous
GO:0098800	inner mitochondrial membrane protein complex	0.0113	542	CC	Mcav Wtchange Continuous
GO:0003735	structural constituent of ribosome	0.0818	352	MF	Mcav Wtchange Continuous
GO:0004601;GO:0016684	peroxidase activity	0.0697	935	MF	Mcav Wtchange Continuous
GO:0016209	antioxidant activity	0.0818	709	MF	Mcav Wtchange Continuous
GO:0016491	oxidoreductase activity	0.0614	240	MF	Mcav Wtchange Continuous
GO:0004888	transmembrane signaling receptor activity	0.00169	-290	MF	Ofav WT1 Continuous
GO:0004930	G protein-coupled receptor activity	0.0577	-349	MF	Ofav WT1 Continuous
GO:0038023;GO:0060089	molecular transducer activity	0.00845	-221	MF	Ofav WT1 Continuous
GO:0005700	polytene chromosome	0.0516	301	CC	Ofav WTchange Continuous
GO:0008021;GO:0070382	exocytic vesicle	0.0516	309	CC	Ofav WTchange Continuous
GO:0004888	transmembrane signaling receptor activity	0.056	-241	MF	Ofav WTchange Continuous
