# Supplementary material for: Mechanisms and potential immune tradeoffs of accelerated coral growth induced by microfragmentation
Source: PeerJ. 2022 Mar 29;10:e13158. doi: 10.7717/peerj.13158 (PMC8973463; doi:10.7717/peerj.13158)
Supplement: Supplemental Information 13 [file peerj-10-13158-s013.xlsx]

## Sheet: Supplemental_TableS3_WGCNA_Comb
Species	Term	Name	p.adj	GO	Comparison
Montastraea cavernosa	GO:0000375;GO:0008380;GO:0000377;GO:0000398;GO:0006397	mRNA processing	0	BP	Dark Magenta
Montastraea cavernosa	GO:0001701	in utero embryonic development	0.0737	BP	Dark Magenta
Montastraea cavernosa	GO:0006325	chromatin organization	0.045	BP	Dark Magenta
Montastraea cavernosa	GO:0006396	RNA processing	0.0563	BP	Dark Magenta
Montastraea cavernosa	GO:0006935;GO:0042330	taxis	0.07	BP	Dark Magenta
Montastraea cavernosa	GO:0007369	gastrulation	0.0583	BP	Dark Magenta
Montastraea cavernosa	GO:0010172	embryonic body morphogenesis	0.05	BP	Dark Magenta
Montastraea cavernosa	GO:0010594;GO:0010632	regulation of epithelial cell migration	0.0529	BP	Dark Magenta
Montastraea cavernosa	GO:0016569;GO:0016570	covalent chromatin modification	0.0437	BP	Dark Magenta
Montastraea cavernosa	GO:0030278;GO:0045667	regulation of ossification	0.0981	BP	Dark Magenta
Montastraea cavernosa	GO:0031056	regulation of histone modification	0	BP	Dark Magenta
Montastraea cavernosa	GO:0031057	negative regulation of histone modification	0.0214	BP	Dark Magenta
Montastraea cavernosa	GO:0031058;GO:1905269;GO:2001252	positive regulation of chromosome organization	0.05	BP	Dark Magenta
Montastraea cavernosa	GO:0031060;GO:0031062	regulation of histone methylation	0.0542	BP	Dark Magenta
Montastraea cavernosa	GO:0031124;GO:0031123	RNA 3'-end processing	0.0932	BP	Dark Magenta
Montastraea cavernosa	GO:0033044	regulation of chromosome organization	0.03	BP	Dark Magenta
Montastraea cavernosa	GO:0034694	response to prostaglandin	0.0591	BP	Dark Magenta
Montastraea cavernosa	GO:0043484;GO:0050684	regulation of RNA splicing	0.0762	BP	Dark Magenta
Montastraea cavernosa	GO:0046058	cAMP metabolic process	0.0567	BP	Dark Magenta
Montastraea cavernosa	GO:0051276	chromosome organization	0.025	BP	Dark Magenta
Montastraea cavernosa	GO:0060281;GO:1905879	regulation of oocyte development	0.0571	BP	Dark Magenta
Montastraea cavernosa	GO:1902275	regulation of chromatin organization	0	BP	Dark Magenta
Montastraea cavernosa	GO:1905268	negative regulation of chromatin organization	0	BP	Dark Magenta
Montastraea cavernosa	GO:0000775	chromosome, centromeric region	0.05	CC	Dark Magenta
Montastraea cavernosa	GO:0000785	chromatin	0.02	CC	Dark Magenta
Montastraea cavernosa	GO:0005681	spliceosomal complex	0.0767	CC	Dark Magenta
Montastraea cavernosa	GO:0005694;GO:0044427	chromosome	0.025	CC	Dark Magenta
Montastraea cavernosa	GO:0005700	polytene chromosome	0.0679	CC	Dark Magenta
Montastraea cavernosa	GO:0005701	polytene chromosome chromocenter	0.0667	CC	Dark Magenta
Montastraea cavernosa	GO:0005730	nucleolus	0.0659	CC	Dark Magenta
Montastraea cavernosa	GO:0005884	actin filament	0.055	CC	Dark Magenta
Montastraea cavernosa	GO:0005911;GO:0070161	anchoring junction	0.025	CC	Dark Magenta
Montastraea cavernosa	GO:0005923	bicellular tight junction	0.0222	CC	Dark Magenta
Montastraea cavernosa	GO:0005938	cell cortex	0.0545	CC	Dark Magenta
Montastraea cavernosa	GO:0009898;GO:0098562	cytoplasmic side of membrane	0.0658	CC	Dark Magenta
Montastraea cavernosa	GO:0016327	apicolateral plasma membrane	0.05	CC	Dark Magenta
Montastraea cavernosa	GO:0016363;GO:0034399	nuclear periphery	0.025	CC	Dark Magenta
Montastraea cavernosa	GO:0016604	nuclear body	0.0904	CC	Dark Magenta
Montastraea cavernosa	GO:0016607	nuclear speck	0.0938	CC	Dark Magenta
Montastraea cavernosa	GO:0030054	cell junction	0.0694	CC	Dark Magenta
Montastraea cavernosa	GO:0030863	cortical cytoskeleton	0.0676	CC	Dark Magenta
Montastraea cavernosa	GO:0043005;GO:0097458	obsolete neuron part	0.0804	CC	Dark Magenta
Montastraea cavernosa	GO:0043198	dendritic shaft	0.092	CC	Dark Magenta
Montastraea cavernosa	GO:0044448	obsolete cell cortex part	0.0214	CC	Dark Magenta
Montastraea cavernosa	GO:0044451	obsolete nucleoplasm part	0.0692	CC	Dark Magenta
Montastraea cavernosa	GO:0070160;GO:0043296	apical junction complex	0.0167	CC	Dark Magenta
Montastraea cavernosa	GO:0071011;GO:0071013	catalytic step 2 spliceosome	0.07	CC	Dark Magenta
Montastraea cavernosa	GO:0098552	side of membrane	0.025	CC	Dark Magenta
Montastraea cavernosa	GO:0098687	chromosomal region	0.0719	CC	Dark Magenta
Montastraea cavernosa	GO:0099080	supramolecular complex	0.0889	CC	Dark Magenta
Montastraea cavernosa	GO:0005543	phospholipid binding	0.0875	MF	Dark Magenta
Montastraea cavernosa	GO:0035091	phosphatidylinositol binding	0.09	MF	Dark Magenta
Montastraea cavernosa	GO:0000022;GO:0051231	spindle elongation	0	BP	Green
Montastraea cavernosa	GO:0000184	nuclear-transcribed mRNA catabolic process, nonsense-mediated decay	0	BP	Green
Montastraea cavernosa	GO:0000226	microtubule cytoskeleton organization	0.0167	BP	Green
Montastraea cavernosa	GO:0000956;GO:0006402;GO:0006401	RNA catabolic process	0	BP	Green
Montastraea cavernosa	GO:0006412;GO:0043043;GO:0006518;GO:0043604	peptide metabolic process	0	BP	Green
Montastraea cavernosa	GO:0006413	translational initiation	0	BP	Green
Montastraea cavernosa	GO:0006414;GO:0006415;GO:0019080;GO:0019083	translational elongation	0	BP	Green
Montastraea cavernosa	GO:0006605;GO:0072594	protein targeting	0	BP	Green
Montastraea cavernosa	GO:0006612;GO:0090150	establishment of protein localization to membrane	0	BP	Green
Montastraea cavernosa	GO:0006613;GO:0006614;GO:0045047;GO:0072599;GO:0070972	protein localization to endoplasmic reticulum	0	BP	Green
Montastraea cavernosa	GO:0006886	intracellular protein transport	0	BP	Green
Montastraea cavernosa	GO:0007006	mitochondrial membrane organization	0.025	BP	Green
Montastraea cavernosa	GO:0007017	microtubule-based process	0.05	BP	Green
Montastraea cavernosa	GO:0007051;GO:0007052;GO:1902850	microtubule cytoskeleton organization involved in mitosis	0	BP	Green
Montastraea cavernosa	GO:0007098;GO:0051298	centrosome cycle	0.0692	BP	Green
Montastraea cavernosa	GO:0016482	cytosolic transport	0	BP	Green
Montastraea cavernosa	GO:0019058	viral life cycle	0	BP	Green
Montastraea cavernosa	GO:0022411	cellular component disassembly	0	BP	Green
Montastraea cavernosa	GO:0031023	microtubule organizing center organization	0.0893	BP	Green
Montastraea cavernosa	GO:0033365	protein localization to organelle	0	BP	Green
Montastraea cavernosa	GO:0034599;GO:0062197	cellular response to chemical stress	0.0948	BP	Green
Montastraea cavernosa	GO:0034614	cellular response to reactive oxygen species	0.0759	BP	Green
Montastraea cavernosa	GO:0043603	cellular amide metabolic process	0	BP	Green
Montastraea cavernosa	GO:0043624;GO:0032984	protein-containing complex disassembly	0	BP	Green
Montastraea cavernosa	GO:0044265;GO:0009057	macromolecule catabolic process	0	BP	Green
Montastraea cavernosa	GO:0044403;GO:0016032;GO:0044764	biological process involved in symbiotic interaction	0	BP	Green
Montastraea cavernosa	GO:0061024	membrane organization	0.048	BP	Green
Montastraea cavernosa	GO:0072657	protein localization to membrane	0	BP	Green
Montastraea cavernosa	GO:1903047;GO:0000278	mitotic cell cycle	0.0326	BP	Green
Montastraea cavernosa	GO:0005740;GO:0031966	mitochondrial envelope	0	CC	Green
Montastraea cavernosa	GO:0005777;GO:0042579	microbody	0.0895	CC	Green
Montastraea cavernosa	GO:0005782;GO:0031907	peroxisomal matrix	0.0625	CC	Green
Montastraea cavernosa	GO:0005811	lipid droplet	0.06	CC	Green
Montastraea cavernosa	GO:0005840;GO:0044391	ribosome	0	CC	Green
Montastraea cavernosa	GO:0015934	large ribosomal subunit	0	CC	Green
Montastraea cavernosa	GO:0015935	small ribosomal subunit	0.00455	CC	Green
Montastraea cavernosa	GO:0019866;GO:0005743	organelle inner membrane	0	CC	Green
Montastraea cavernosa	GO:0022625	cytosolic large ribosomal subunit	0	CC	Green
Montastraea cavernosa	GO:0022626	cytosolic ribosome	0	CC	Green
Montastraea cavernosa	GO:0022627	cytosolic small ribosomal subunit	0.005	CC	Green
Montastraea cavernosa	GO:0031967;GO:0031975	envelope	0.0647	CC	Green
Montastraea cavernosa	GO:0044429	obsolete mitochondrial part	0.0269	CC	Green
Montastraea cavernosa	GO:0044432;GO:0005789;GO:0042175	obsolete endoplasmic reticulum part	0.0861	CC	Green
Montastraea cavernosa	GO:0044445	obsolete cytosolic part	0	CC	Green
Montastraea cavernosa	GO:0044455	obsolete mitochondrial membrane part	0.0208	CC	Green
Montastraea cavernosa	GO:0098798	mitochondrial protein-containing complex	0.0321	CC	Green
Montastraea cavernosa	GO:0098800	inner mitochondrial membrane protein complex	0	CC	Green
Montastraea cavernosa	GO:1990904	ribonucleoprotein complex	0	CC	Green
Montastraea cavernosa	GO:0003735	structural constituent of ribosome	0	MF	Green
Montastraea cavernosa	GO:0005198	structural molecule activity	0.0167	MF	Green
Montastraea cavernosa	GO:0016830	carbon-carbon lyase activity	0.025	MF	Green
Montastraea cavernosa	GO:0016831	carboxy-lyase activity	0.07	MF	Green
Montastraea cavernosa	GO:0070628	proteasome binding	0.025	MF	Green
Montastraea cavernosa	GO:0005768	endosome	0	CC	Grey 60
Montastraea cavernosa	GO:0005773;GO:0000323;GO:0005764	vacuole	0.0625	CC	Grey 60
Montastraea cavernosa	GO:0005788	endoplasmic reticulum lumen	0	CC	Grey 60
Montastraea cavernosa	GO:0016528;GO:0016529	sarcoplasm	0.0333	CC	Grey 60
Montastraea cavernosa	GO:0044432;GO:0005789;GO:0042175	obsolete endoplasmic reticulum part	0.09	CC	Grey 60
Montastraea cavernosa	GO:0000022;GO:0051231	spindle elongation	0	BP	Light Cyan 1
Montastraea cavernosa	GO:0000028	ribosomal small subunit assembly	0	BP	Light Cyan 1
Montastraea cavernosa	GO:0000184	nuclear-transcribed mRNA catabolic process, nonsense-mediated decay	0.04	BP	Light Cyan 1
Montastraea cavernosa	GO:0000226	microtubule cytoskeleton organization	0.0925	BP	Light Cyan 1
Montastraea cavernosa	GO:0006412;GO:0043043;GO:0006518;GO:0043604	peptide metabolic process	0	BP	Light Cyan 1
Montastraea cavernosa	GO:0006413	translational initiation	0	BP	Light Cyan 1
Montastraea cavernosa	GO:0006414;GO:0006415;GO:0019080;GO:0019083	translational elongation	0.0571	BP	Light Cyan 1
Montastraea cavernosa	GO:0006613;GO:0006614;GO:0045047;GO:0072599;GO:0070972	protein localization to endoplasmic reticulum	0.0409	BP	Light Cyan 1
Montastraea cavernosa	GO:0006886	intracellular protein transport	0.0861	BP	Light Cyan 1
Montastraea cavernosa	GO:0007017	microtubule-based process	0.0921	BP	Light Cyan 1
Montastraea cavernosa	GO:0007051;GO:0007052;GO:1902850	microtubule cytoskeleton organization involved in mitosis	0	BP	Light Cyan 1
Montastraea cavernosa	GO:0019058	viral life cycle	0.04	BP	Light Cyan 1
Montastraea cavernosa	GO:0022618;GO:0071826	ribonucleoprotein complex subunit organization	0.0844	BP	Light Cyan 1
Montastraea cavernosa	GO:0042255	ribosome assembly	0.05	BP	Light Cyan 1
Montastraea cavernosa	GO:0042274	ribosomal small subunit biogenesis	0.0654	BP	Light Cyan 1
Montastraea cavernosa	GO:0042730	fibrinolysis	0.0733	BP	Light Cyan 1
Montastraea cavernosa	GO:0043603	cellular amide metabolic process	0	BP	Light Cyan 1
Montastraea cavernosa	GO:0043624;GO:0032984	protein-containing complex disassembly	0.0417	BP	Light Cyan 1
Montastraea cavernosa	GO:0070925	organelle assembly	0.0786	BP	Light Cyan 1
Montastraea cavernosa	GO:1903047;GO:0000278	mitotic cell cycle	0.0912	BP	Light Cyan 1
Montastraea cavernosa	GO:0005840;GO:0044391	ribosome	0	CC	Light Cyan 1
Montastraea cavernosa	GO:0015935	small ribosomal subunit	0	CC	Light Cyan 1
Montastraea cavernosa	GO:0022626	cytosolic ribosome	0	CC	Light Cyan 1
Montastraea cavernosa	GO:0022627	cytosolic small ribosomal subunit	0	CC	Light Cyan 1
Montastraea cavernosa	GO:0044445	obsolete cytosolic part	0	CC	Light Cyan 1
Montastraea cavernosa	GO:1990904	ribonucleoprotein complex	0	CC	Light Cyan 1
Montastraea cavernosa	GO:0003735	structural constituent of ribosome	0	MF	Light Cyan 1
Montastraea cavernosa	GO:0005198	structural molecule activity	0	MF	Light Cyan 1
Montastraea cavernosa	GO:0005216;GO:0015267;GO:0022803;GO:0005261	channel activity	0.05	MF	Midnight Blue
Montastraea cavernosa	GO:0010035	response to inorganic substance	0	BP	Violet
Orbicella faveolata	GO:0000184	nuclear-transcribed mRNA catabolic process, nonsense-mediated decay	0	BP	Black
Orbicella faveolata	GO:0000956;GO:0006402;GO:0006401	RNA catabolic process	0.0111	BP	Black
Orbicella faveolata	GO:0002181	cytoplasmic translation	0	BP	Black
Orbicella faveolata	GO:0002252	immune effector process	0.0672	BP	Black
Orbicella faveolata	GO:0006091	generation of precursor metabolites and energy	0.0906	BP	Black
Orbicella faveolata	GO:0006119	oxidative phosphorylation	0.0269	BP	Black
Orbicella faveolata	GO:0006412;GO:0043043;GO:0006518;GO:0043604	amide biosynthetic process	0	BP	Black
Orbicella faveolata	GO:0006413	translational initiation	0.0167	BP	Black
Orbicella faveolata	GO:0006605	protein targeting	0.065	BP	Black
Orbicella faveolata	GO:0006612	protein targeting to membrane	0.0125	BP	Black
Orbicella faveolata	GO:0006613;GO:0006614;GO:0045047;GO:0072599;GO:0070972	protein localization to endoplasmic reticulum	0	BP	Black
Orbicella faveolata	GO:0006909	phagocytosis	0.0267	BP	Black
Orbicella faveolata	GO:0007005	mitochondrion organization	0.0389	BP	Black
Orbicella faveolata	GO:0007007	inner mitochondrial membrane organization	0.0542	BP	Black
Orbicella faveolata	GO:0007015	actin filament organization	0.0537	BP	Black
Orbicella faveolata	GO:0009057;GO:0044265	macromolecule catabolic process	0.0143	BP	Black
Orbicella faveolata	GO:0015985;GO:0015986;GO:0042776	ATP synthesis coupled proton transport	0.015	BP	Black
Orbicella faveolata	GO:0019439;GO:0044270;GO:0046700;GO:1901361;GO:0034655	organic cyclic compound catabolic process	0.056	BP	Black
Orbicella faveolata	GO:0030838	positive regulation of actin filament polymerization	0.0437	BP	Black
Orbicella faveolata	GO:0032273	positive regulation of protein polymerization	0.05	BP	Black
Orbicella faveolata	GO:0033572;GO:0072512	transferrin transport	0.0679	BP	Black
Orbicella faveolata	GO:0042254	ribosome biogenesis	0.025	BP	Black
Orbicella faveolata	GO:0042273	ribosomal large subunit biogenesis	0.0208	BP	Black
Orbicella faveolata	GO:0043603	cellular amide metabolic process	0	BP	Black
Orbicella faveolata	GO:0045010	actin nucleation	0.0412	BP	Black
Orbicella faveolata	GO:0061024	membrane organization	0.0839	BP	Black
Orbicella faveolata	GO:0072583	clathrin-dependent endocytosis	0.0425	BP	Black
Orbicella faveolata	GO:0072594	establishment of protein localization to organelle	0.0545	BP	Black
Orbicella faveolata	GO:0090150	establishment of protein localization to membrane	0.0227	BP	Black
Orbicella faveolata	GO:1901136	carbohydrate derivative catabolic process	0.0522	BP	Black
Orbicella faveolata	GO:1901658	glycosyl compound catabolic process	0.0368	BP	Black
Orbicella faveolata	GO:1990542	mitochondrial transmembrane transport	0.0538	BP	Black
Orbicella faveolata	GO:0000323;GO:0005773;GO:0005764	vacuole	0	CC	Black
Orbicella faveolata	GO:0005743;GO:0019866	organelle inner membrane	0.05	CC	Black
Orbicella faveolata	GO:0005753;GO:0045259	mitochondrial proton-transporting ATP synthase complex	0	CC	Black
Orbicella faveolata	GO:0005765;GO:0098852;GO:0005774	vacuolar membrane	0.0261	CC	Black
Orbicella faveolata	GO:0005766;GO:0035578;GO:0042582	azurophil granule	0	CC	Black
Orbicella faveolata	GO:0005775	vacuolar lumen	0.0484	CC	Black
Orbicella faveolata	GO:0005776	autophagosome	0.005	CC	Black
Orbicella faveolata	GO:0005840;GO:0044391	ribosome	0	CC	Black
Orbicella faveolata	GO:0005844	polysome	0.0943	CC	Black
Orbicella faveolata	GO:0015934	large ribosomal subunit	0	CC	Black
Orbicella faveolata	GO:0015935	small ribosomal subunit	0	CC	Black
Orbicella faveolata	GO:0016469	proton-transporting two-sector ATPase complex	0	CC	Black
Orbicella faveolata	GO:0016471;GO:0033176	vacuolar proton-transporting V-type ATPase complex	0.0481	CC	Black
Orbicella faveolata	GO:0022625	cytosolic large ribosomal subunit	0	CC	Black
Orbicella faveolata	GO:0022626	cytosolic ribosome	0	CC	Black
Orbicella faveolata	GO:0022627	cytosolic small ribosomal subunit	0	CC	Black
Orbicella faveolata	GO:0030117;GO:0048475	membrane coat	0.0327	CC	Black
Orbicella faveolata	GO:0030118	clathrin coat	0.00526	CC	Black
Orbicella faveolata	GO:0030119	AP-type membrane coat adaptor complex	0.05	CC	Black
Orbicella faveolata	GO:0030120	vesicle coat	0.0271	CC	Black
Orbicella faveolata	GO:0030131;GO:0030125	clathrin vesicle coat	0.00476	CC	Black
Orbicella faveolata	GO:0030687	preribosome, large subunit precursor	0.0515	CC	Black
Orbicella faveolata	GO:0031941	filamentous actin	0.05	CC	Black
Orbicella faveolata	GO:0033178	proton-transporting two-sector ATPase complex, catalytic domain	0	CC	Black
Orbicella faveolata	GO:0035577	azurophil granule membrane	0.0482	CC	Black
Orbicella faveolata	GO:0042788	polysomal ribosome	0.0136	CC	Black
Orbicella faveolata	GO:0043202	lysosomal lumen	0.034	CC	Black
Orbicella faveolata	GO:0044437	obsolete vacuolar part	0	CC	Black
Orbicella faveolata	GO:0044445	obsolete cytosolic part	0	CC	Black
Orbicella faveolata	GO:0044455	obsolete mitochondrial membrane part	0.00556	CC	Black
Orbicella faveolata	GO:0045335	phagocytic vesicle	0.0618	CC	Black
Orbicella faveolata	GO:0097440	apical dendrite	0.0986	CC	Black
Orbicella faveolata	GO:0098796	membrane protein complex	0.00588	CC	Black
Orbicella faveolata	GO:0098798	mitochondrial protein-containing complex	0	CC	Black
Orbicella faveolata	GO:0098800	inner mitochondrial membrane protein complex	0	CC	Black
Orbicella faveolata	GO:1990904	ribonucleoprotein complex	0	CC	Black
Orbicella faveolata	GO:0003735	structural constituent of ribosome	0	MF	Black
Orbicella faveolata	GO:0005198	structural molecule activity	0	MF	Black
Orbicella faveolata	GO:0016651	oxidoreductase activity, acting on NAD(P)H	0.0875	MF	Black
Orbicella faveolata	GO:0044769;GO:0046961;GO:0009678	ATPase activity, coupled to transmembrane movement of ions, rotational mechanism	0	MF	Black
Orbicella faveolata	GO:0022626	cytosolic ribosome	0	CC	Dark Red
Orbicella faveolata	GO:0007517	muscle organ development	0	BP	Green Yellow
Orbicella faveolata	GO:0000096	sulfur amino acid metabolic process	0.0574	BP	Light Green
Orbicella faveolata	GO:0001101	response to acid chemical	0.0945	BP	Light Green
Orbicella faveolata	GO:0001505	regulation of neurotransmitter levels	0.05	BP	Light Green
Orbicella faveolata	GO:0006082;GO:0019752;GO:0043436	organic acid metabolic process	0.0971	BP	Light Green
Orbicella faveolata	GO:0006520;GO:1901605	cellular amino acid metabolic process	0.0815	BP	Light Green
Orbicella faveolata	GO:0006522;GO:0009078	alanine metabolic process	0.0561	BP	Light Green
Orbicella faveolata	GO:0006544	glycine metabolic process	0.0946	BP	Light Green
Orbicella faveolata	GO:0006970	response to osmotic stress	0.0951	BP	Light Green
Orbicella faveolata	GO:0006979	response to oxidative stress	0.0667	BP	Light Green
Orbicella faveolata	GO:0007565	female pregnancy	0.0789	BP	Light Green
Orbicella faveolata	GO:0007568	aging	0.0761	BP	Light Green
Orbicella faveolata	GO:0008637	apoptotic mitochondrial changes	0.0646	BP	Light Green
Orbicella faveolata	GO:0008652;GO:1901607	cellular amino acid biosynthetic process	0.0674	BP	Light Green
Orbicella faveolata	GO:0009062;GO:0072329	monocarboxylic acid catabolic process	0.0709	BP	Light Green
Orbicella faveolata	GO:0009636	response to toxic substance	0.0214	BP	Light Green
Orbicella faveolata	GO:0009725	response to hormone	0.0589	BP	Light Green
Orbicella faveolata	GO:0009743	response to carbohydrate	0.0375	BP	Light Green
Orbicella faveolata	GO:0009746;GO:0034284;GO:0009749	response to monosaccharide	0.0167	BP	Light Green
Orbicella faveolata	GO:0009991;GO:0031667	response to extracellular stimulus	0.0635	BP	Light Green
Orbicella faveolata	GO:0010035	response to inorganic substance	0.0364	BP	Light Green
Orbicella faveolata	GO:0010038	response to metal ion	0.01	BP	Light Green
Orbicella faveolata	GO:0010243	response to organonitrogen compound	0.062	BP	Light Green
Orbicella faveolata	GO:0010288	response to lead ion	0.0167	BP	Light Green
Orbicella faveolata	GO:0014070	response to organic cyclic compound	0.0726	BP	Light Green
Orbicella faveolata	GO:0014074	response to purine-containing compound	0.025	BP	Light Green
Orbicella faveolata	GO:0014823	response to activity	0.0629	BP	Light Green
Orbicella faveolata	GO:0016525;GO:2000181;GO:1901343	negative regulation of vasculature development	0.0922	BP	Light Green
Orbicella faveolata	GO:0016999	antibiotic metabolic process	0.0611	BP	Light Green
Orbicella faveolata	GO:0017001	antibiotic catabolic process	0.072	BP	Light Green
Orbicella faveolata	GO:0017144	drug metabolic process	0.0462	BP	Light Green
Orbicella faveolata	GO:0031960;GO:0051384	response to corticosteroid	0.0694	BP	Light Green
Orbicella faveolata	GO:0032787	monocarboxylic acid metabolic process	0.0827	BP	Light Green
Orbicella faveolata	GO:0032868;GO:0032869	response to insulin	0.0802	BP	Light Green
Orbicella faveolata	GO:0032870	cellular response to hormone stimulus	0.0944	BP	Light Green
Orbicella faveolata	GO:0033555	multicellular organismal response to stress	0.0931	BP	Light Green
Orbicella faveolata	GO:0033993	response to lipid	0.0972	BP	Light Green
Orbicella faveolata	GO:0034612;GO:0071356	response to tumor necrosis factor	0.055	BP	Light Green
Orbicella faveolata	GO:0035690	cellular response to drug	0.0945	BP	Light Green
Orbicella faveolata	GO:0042133	neurotransmitter metabolic process	0.0581	BP	Light Green
Orbicella faveolata	GO:0042493	response to drug	0.093	BP	Light Green
Orbicella faveolata	GO:0043279	response to alkaloid	0.0958	BP	Light Green
Orbicella faveolata	GO:0043434;GO:1901652	response to peptide	0.0559	BP	Light Green
Orbicella faveolata	GO:0043627	response to estrogen	0.0658	BP	Light Green
Orbicella faveolata	GO:0045471	response to ethanol	0.0444	BP	Light Green
Orbicella faveolata	GO:0046394;GO:0016053	organic acid biosynthetic process	0.0705	BP	Light Green
Orbicella faveolata	GO:0046677	response to antibiotic	0.0469	BP	Light Green
Orbicella faveolata	GO:0046683;GO:0051591	response to organophosphorus	0.0125	BP	Light Green
Orbicella faveolata	GO:0046898;GO:0060992	response to fungicide	0.04	BP	Light Green
Orbicella faveolata	GO:0046902;GO:0090559	regulation of membrane permeability	0.0636	BP	Light Green
Orbicella faveolata	GO:0048545	response to steroid hormone	0.0809	BP	Light Green
Orbicella faveolata	GO:0062012	regulation of small molecule metabolic process	0.0675	BP	Light Green
Orbicella faveolata	GO:0071107;GO:0071374	response to parathyroid hormone	0.0942	BP	Light Green
Orbicella faveolata	GO:0071241	cellular response to inorganic substance	0.0645	BP	Light Green
Orbicella faveolata	GO:0071248	cellular response to metal ion	0.0563	BP	Light Green
Orbicella faveolata	GO:0071322;GO:0001678;GO:0071326;GO:0071331;GO:0071333	cellular response to carbohydrate stimulus	0.0433	BP	Light Green
Orbicella faveolata	GO:0071375;GO:1901653	cellular response to peptide	0.0935	BP	Light Green
Orbicella faveolata	GO:0071384;GO:0071385	cellular response to corticosteroid stimulus	0.0608	BP	Light Green
Orbicella faveolata	GO:0071407	cellular response to organic cyclic compound	0.0963	BP	Light Green
Orbicella faveolata	GO:0071466	cellular response to xenobiotic stimulus	0.0939	BP	Light Green
Orbicella faveolata	GO:0071548	response to dexamethasone	0.0569	BP	Light Green
Orbicella faveolata	GO:0071549	cellular response to dexamethasone stimulus	0.0464	BP	Light Green
Orbicella faveolata	GO:0072593	reactive oxygen species metabolic process	0	BP	Light Green
Orbicella faveolata	GO:0097305	response to alcohol	0.0625	BP	Light Green
Orbicella faveolata	GO:1903532;GO:0051047	positive regulation of secretion	0.0725	BP	Light Green
Orbicella faveolata	GO:0005740;GO:0031966	mitochondrial envelope	0	CC	Light Green
Orbicella faveolata	GO:0005741;GO:0031968;GO:0019867	organelle outer membrane	0.03	CC	Light Green
Orbicella faveolata	GO:0005759	mitochondrial matrix	0	CC	Light Green
Orbicella faveolata	GO:0031967;GO:0031975	organelle envelope	0	CC	Light Green
Orbicella faveolata	GO:0044429	obsolete mitochondrial part	0	CC	Light Green
Orbicella faveolata	GO:1900117	regulation of execution phase of apoptosis	0	BP	Royal Blue
Orbicella faveolata	GO:0005924;GO:0005925	obsolete cell-substrate adherens junction	0.05	CC	Royal Blue
Orbicella faveolata	GO:0030055	cell-substrate junction	0.075	CC	Royal Blue
Orbicella faveolata	GO:0000977	RNA polymerase II transcription regulatory region sequence-specific DNA binding	0.05	MF	Royal Blue
Orbicella faveolata	GO:0000981;GO:0003700	DNA-binding transcription factor activity	0.05	MF	Royal Blue
Orbicella faveolata	GO:0003743	translation initiation factor activity	0.0875	MF	Steel Blue
Orbicella faveolata	GO:0016853	isomerase activity	0.0167	MF	Steel Blue
Orbicella faveolata	GO:0016877	ligase activity, forming carbon-sulfur bonds	0.025	MF	Steel Blue
Orbicella faveolata	GO:0016878	acid-thiol ligase activity	0.07	MF	Steel Blue
Orbicella faveolata	GO:0030331	estrogen receptor binding	0.075	MF	Steel Blue
Orbicella faveolata	GO:0033218	amide binding	0	MF	Steel Blue
Orbicella faveolata	GO:0001503	ossification	0.0583	BP	Turquoise
Orbicella faveolata	GO:0001649	osteoblast differentiation	0.05	BP	Turquoise
Orbicella faveolata	GO:0006935;GO:0042330	taxis	0.0833	BP	Turquoise
Orbicella faveolata	GO:0007186	G protein-coupled receptor signaling pathway	0	BP	Turquoise
Orbicella faveolata	GO:0007218	neuropeptide signaling pathway	0.0625	BP	Turquoise
Orbicella faveolata	GO:0030856	regulation of epithelial cell differentiation	0.0437	BP	Turquoise
Orbicella faveolata	GO:0045926	negative regulation of growth	0.05	BP	Turquoise
Orbicella faveolata	GO:0046957;GO:0052129	negative phototaxis	0.05	BP	Turquoise
Orbicella faveolata	GO:0048640	negative regulation of developmental growth	0.05	BP	Turquoise
Orbicella faveolata	GO:0005887;GO:0031226	intrinsic component of plasma membrane	0	CC	Turquoise
Orbicella faveolata	GO:0001653	peptide receptor activity	0.0125	MF	Turquoise
Orbicella faveolata	GO:0004713	protein tyrosine kinase activity	0.0864	MF	Turquoise
Orbicella faveolata	GO:0004714;GO:0019199	transmembrane receptor protein kinase activity	0.0167	MF	Turquoise
Orbicella faveolata	GO:0004888	transmembrane signaling receptor activity	0	MF	Turquoise
Orbicella faveolata	GO:0004930	G protein-coupled receptor activity	0	MF	Turquoise
Orbicella faveolata	GO:0004995	tachykinin receptor activity	0.0563	MF	Turquoise
Orbicella faveolata	GO:0008188;GO:0008528	G protein-coupled peptide receptor activity	0.01	MF	Turquoise
Orbicella faveolata	GO:0015491;GO:0015298	cation:cation antiporter activity	0.0286	MF	Turquoise
Orbicella faveolata	GO:0015651	quaternary ammonium group transmembrane transporter activity	0.085	MF	Turquoise
Orbicella faveolata	GO:0038023;GO:0060089	molecular transducer activity	0	MF	Turquoise
Orbicella faveolata	GO:0050839	cell adhesion molecule binding	0.0556	MF	Turquoise
